# Supplementary material for: Suppression of H2 bubble formation on an electrified Pt electrode interface in an acidic “water-in-salt” electrolyte solution
Source: Royal Society of Chemistry journal article supplement (doi:10.1039/d2ta06434k), 2022-01-01
Supplement: d2ta06434k1.pdf [file d2ta06434k1.pdf]

Supporting Information

**Suppression of H<sub>2</sub> bubble formation on an electrified Pt electrode interface in an acidic “water-in-salt” electrolyte solution**

Cheolmin Park<sup>1</sup>, Jinho Chang<sup>1,2\*</sup>

*<sup>1</sup>Department of Chemistry and Research Institute for Convergence of Basic Science, Hanyang University, Seoul 04763, Republic of Korea*

*<sup>2</sup>Department of HY-KIST Bio-convergence, Hanyang University, Seoul 04763, Republic of Korea*

## Table of Contents

Figure S1. .... S-1

The linearity of  $i_{pc}$  and  $i_{pa}$  as a function of  $v^{1/2}$ .

Figure S2. .... S-2

(a) The CV at 50 mV/s on a Pt MDE in a 6 m LiTFSI solution containing 50 mM HClO<sub>4</sub> (black line) and the best-fit simulation result (red circle), and (b) the surface concentration profiles of chemical species from the simulated CV in a. For the simulation, the e<sup>-</sup>-transfer rate constant,  $k^o$ , and the transfer coefficient,  $\alpha$ , were set to be 0.1 cm/s and 0.5, respectively.

Figure S3. .... S-3

The CV in an aqueous 6 m LiTFSI solution without HClO<sub>4</sub> on a Pt UME at 20mV/s.

Figure S4. .... S-4

The  $i_{pa}/i_{pc}$  vs.  $v$  plots in aqueous solutions containing the four different types electrolytes with 25 mM HClO<sub>4</sub>.

Figure S5. .... S-5

The CVs (black line) at various  $v$  (20, 50, 100, and 200 mV/s) on a Pt MDE in 6 m LiTFSI solutions containing either (a-d) 50 or (e-h) 100 mM HClO<sub>4</sub>, and the corresponding best-fit simulation results (dotted red circle).

Figure S6. .... S-6

The CVs (black line) at various  $v$  (20, 50, 100, and 200 mV/s) on a Pt MDE in 6 m LiOTf solutions containing either (a-d) 50 or (e-h) 100 mM HClO<sub>4</sub>, and the corresponding best-fit simulation results (dotted blue circle).

Figure S7. .... S-7

The CVs (black line) at various  $v$  (20, 50, 100, and 200 mV/s) on a Pt MDE in 6 m LiNO<sub>3</sub> solutions containing either (a-d) 50 or (e-h) 100 mM HClO<sub>4</sub>, and the corresponding best-fit simulation results (dotted pink circle).

Figure S8. .... S-8

The CVs (black line) at various  $\nu$  (20, 50, 100, and 200 mV/s) on a Pt MDE in 6 m LiCl solutions containing either (a-d) 50 or (e-h) 100 mM HClO<sub>4</sub>, and the corresponding best-fit simulation results (dotted green circle). For the CV in e, the experimentally obtained CV was too distorted to be fitted by the digital simulation due to the adsorption of H<sub>2</sub> bubbles on an electrode surface.

Figure S9. .... S-9

(a) The electrode potential profile vs.  $t$  for (b) the resulting voltammograms at 20 mV/s, which were measured from acidic solutions with the four different types of 6 m electrolytes.

Figure S10. .... S-10

The sequential snapshots of H<sub>2</sub> bubble formation on a Pt MDE during cyclic voltammetry for H<sup>+</sup>/H<sub>2</sub> redox reaction in 50 mM HClO<sub>4</sub> solutions containing either (a) 6 m LiCl or (b) the same molal concentration of LiTFSI.

Note S1. .... S-11

Estimation of the thickness of a modulation layer

Figure S11. .... S-12

The  $\zeta$ -histograms obtained from  $\Delta f$  vs.  $t$  curves in solutions containing various molal concentrations of LiOTf.

Figure S12. .... S-13

The  $\Delta f$  vs.  $t$  curves during HER on Pt electrodes in 50 mM HClO<sub>4</sub> solutions containing 6 m LiTFSI (black) and 9 m LiTFSI (red) through the EQCM measurements.

Note S2. .... S-14

The EQCM measurements for retention of electrogenerated H<sub>2</sub> bubbles on a Pt electrode as a function of applied potentials.

Figure S13. .... S-15

The  $\Delta f$  vs.  $t$  curves measured in acidic 3 m LiTFSI solutions on a Pt electrode as the electrode potential was applied to -0.6 V for 40 minutes and stepped to (a) 0, (b) 0.5, (c) 1, and (d) 1.5 V vs. Ag/AgCl, respectively.

Figure S14. .... S-16

The  $C_d$  as a function of the electrode potentials (vs. Ag/AgCl) on Pt MDEs in 6 m (a) LiTFSI and (b) LiOTf solutions.

Figure S15. .... S-17

The  $C_d$  as a function of the electrode potentials (vs. Ag/AgCl) on an Au MDE in a 6 m LiTFSI solution.

Table S1. .... S-18

The reaction parameters for the simulation results in Figure S5-S8. The transfer coefficients of all the charge transfer reactions were assumed to be 0.5.

Table S2. .... S-19

The measured parameters in acidic solutions containing different types of 6 m electrolytes for the calculation of the thickness of the modulation layers,  $\lambda$ .

References ..... S-20

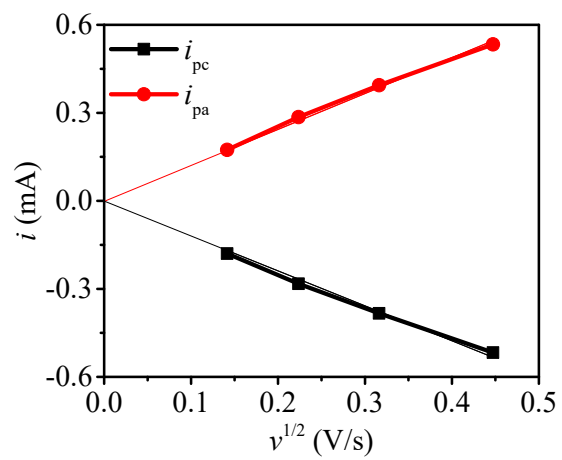

**Figure S1.** The linearity of  $i_{pc}$  and  $i_{pa}$  as a function of  $v^{1/2}$ .

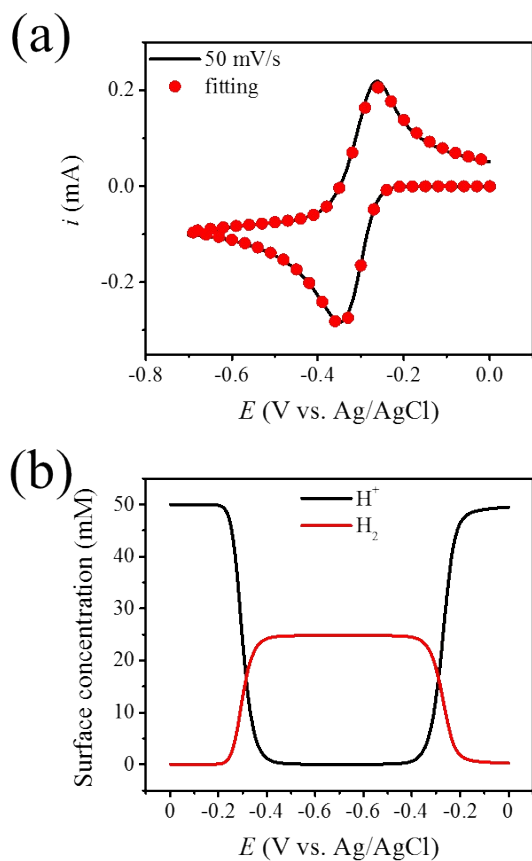

**Figure S2.** (a) The CV at 50 mV/s on a Pt MDE in a 6 m LiTFSI solution containing 50 mM HClO<sub>4</sub> (black line) and the best-fit simulation result (red circle), and (b) the surface concentration profiles of chemical species from the simulated CV in a. For the simulation, the  $e^-$ -transfer rate constant,  $k^0$ , and the transfer coefficient,  $\alpha$ , were set to be 0.1 cm/s and 0.5, respectively.

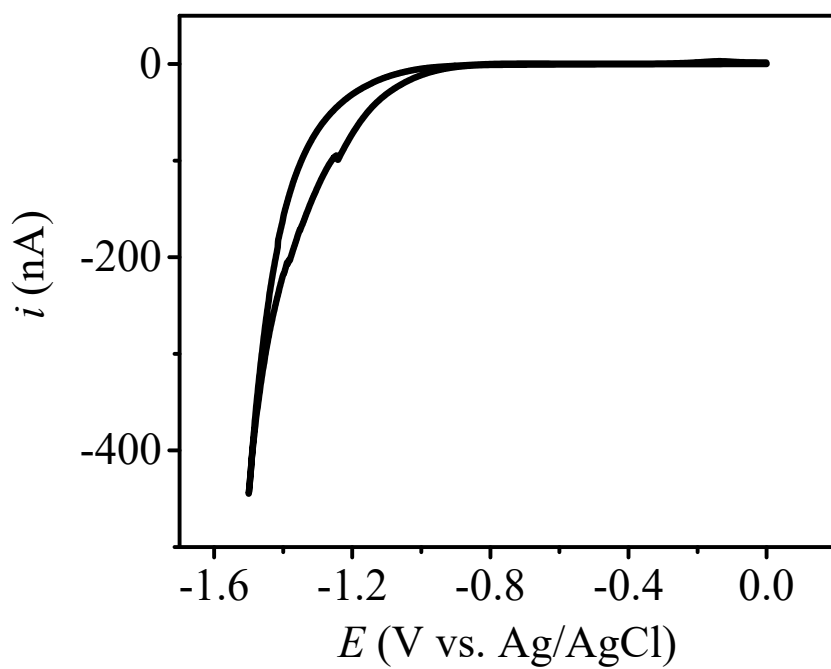

**Figure S3.** The CV in an aqueous 6 m LiTFSI solution without HClO<sub>4</sub> on a Pt UME at 20mV/s.

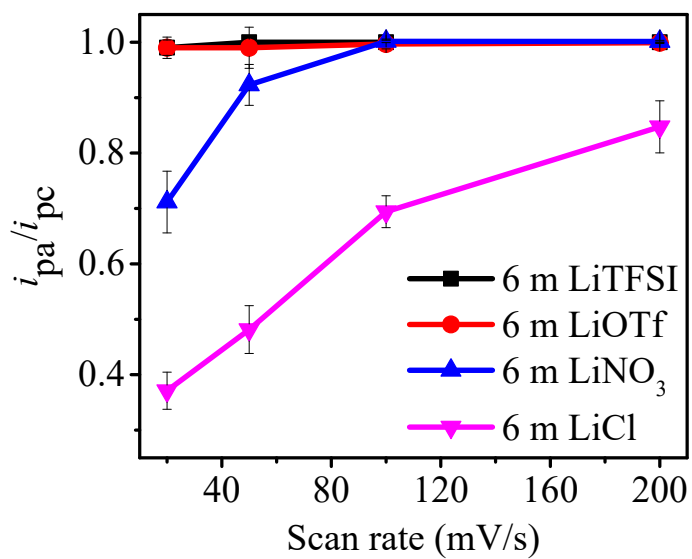

**Figure S4.** The  $i_{pa}/i_{pc}$  vs.  $\nu$  plots in aqueous solutions containing the four different types electrolytes with 25 mM HClO<sub>4</sub>.



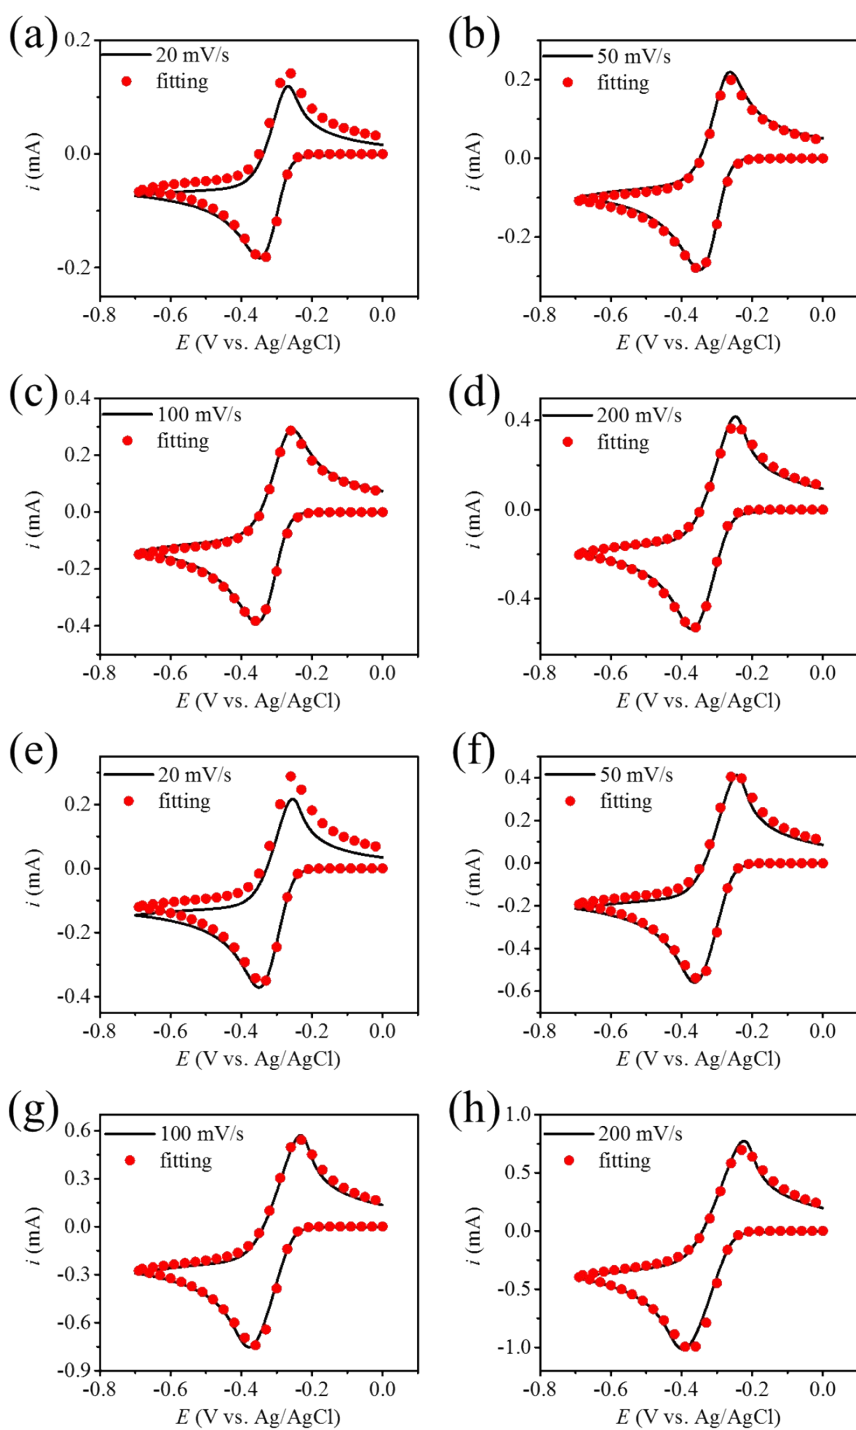

**Figure S5.** The CVs (black line) at various  $\nu$  (20, 50, 100, and 200 mV/s) on a Pt MDE in 6 m LiTFSI solutions containing either (a-d) 50 or (e-h) 100 mM  $\text{HClO}_4$ , and the corresponding best-fit simulation results (dotted red circle).

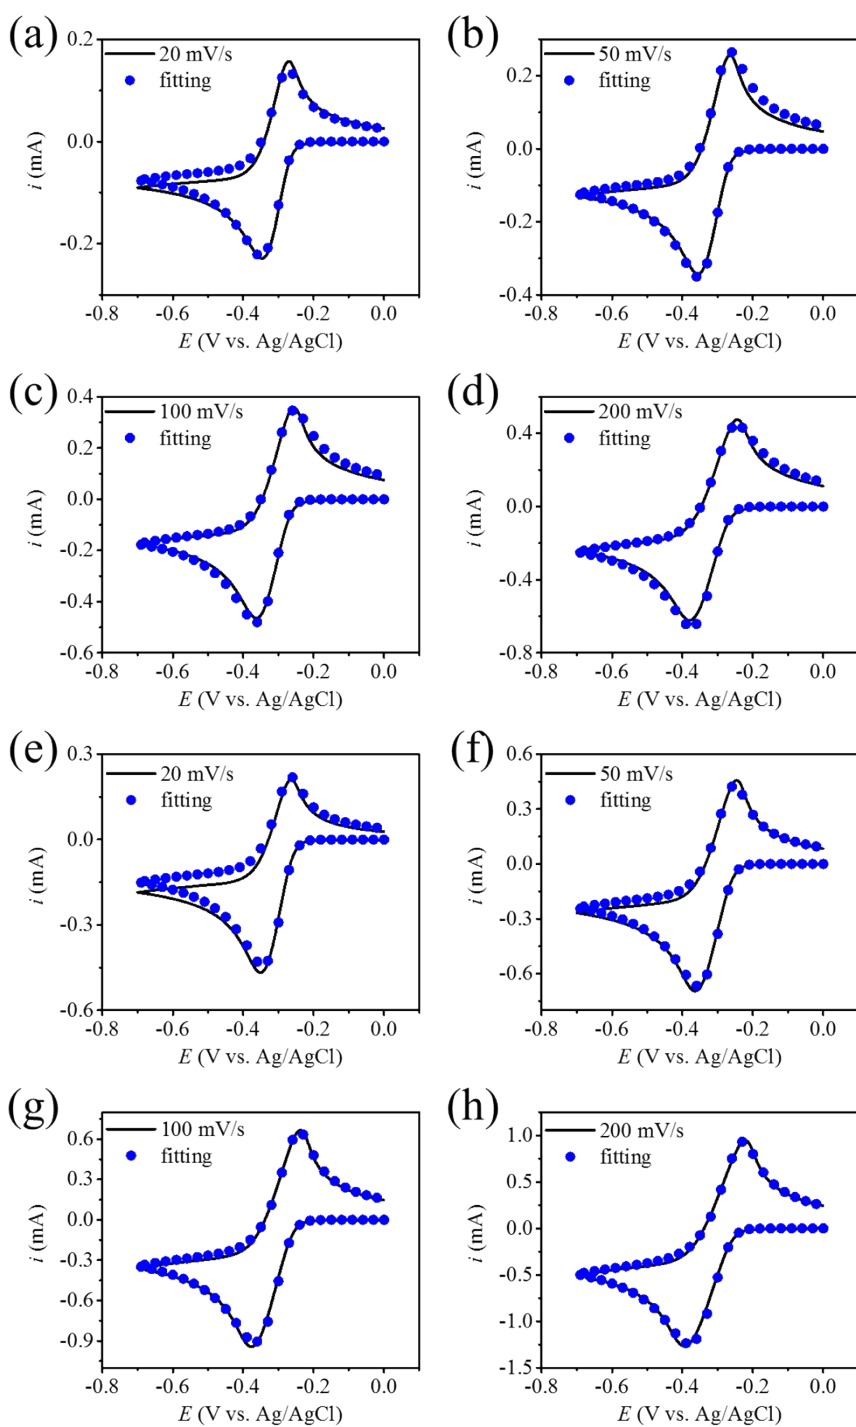

**Figure S6.** The CVs (black line) at various  $\nu$  (20, 50, 100, and 200 mV/s) on a Pt MDE in 6 m LiOTf solutions containing either (a-d) 50 or (e-h) 100 mM HClO<sub>4</sub>, and the corresponding best-fit simulation results (dotted blue circle).

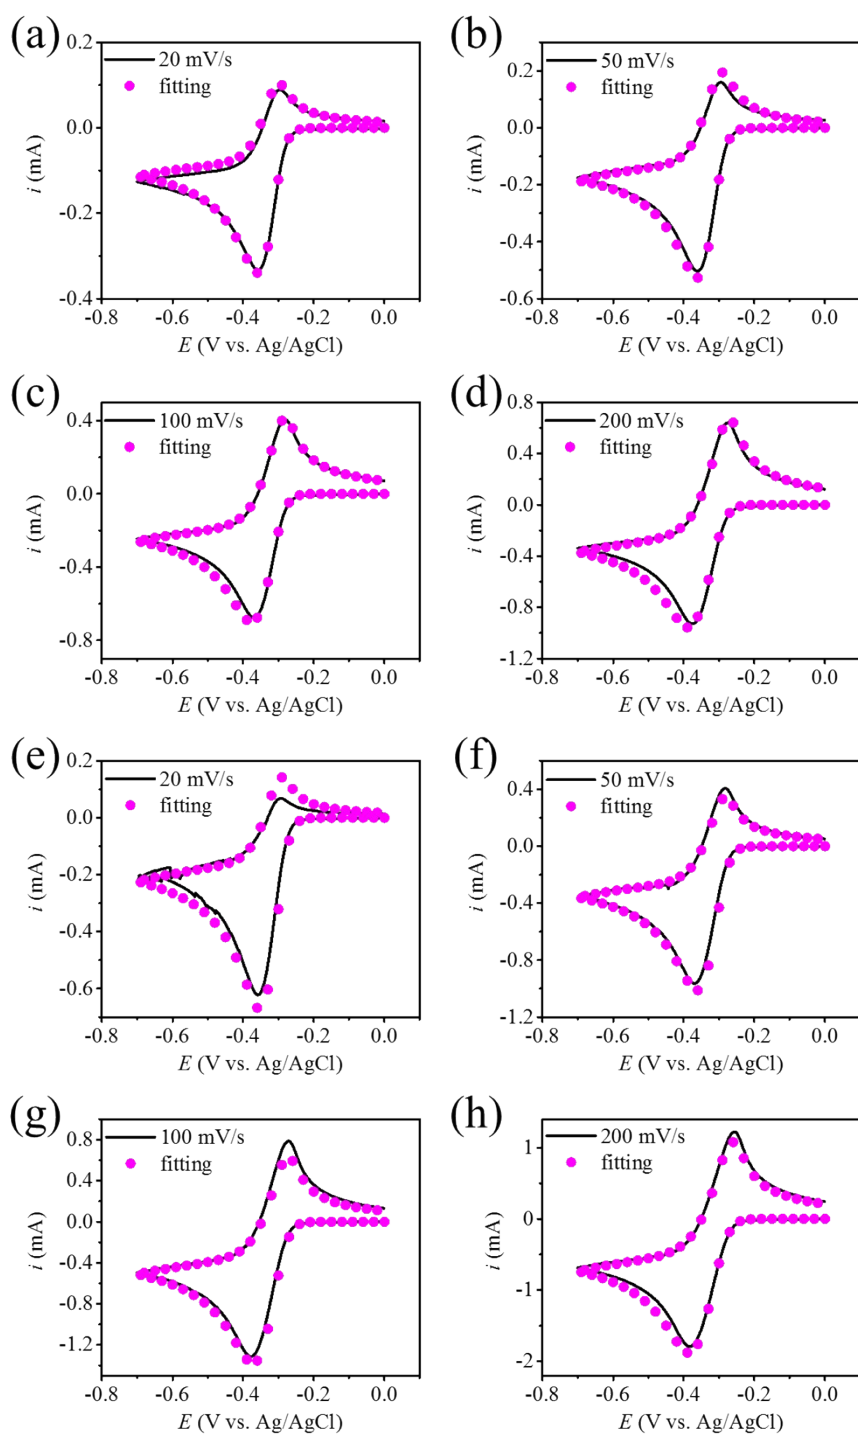

**Figure S7.** The CVs (black line) at various  $v$  (20, 50, 100, and 200 mV/s) on a Pt MDE in 6 m LiNO<sub>3</sub> solutions containing either (a-d) 50 or (e-h) 100 mM HClO<sub>4</sub>, and the corresponding best-fit simulation results (dotted pink circle).

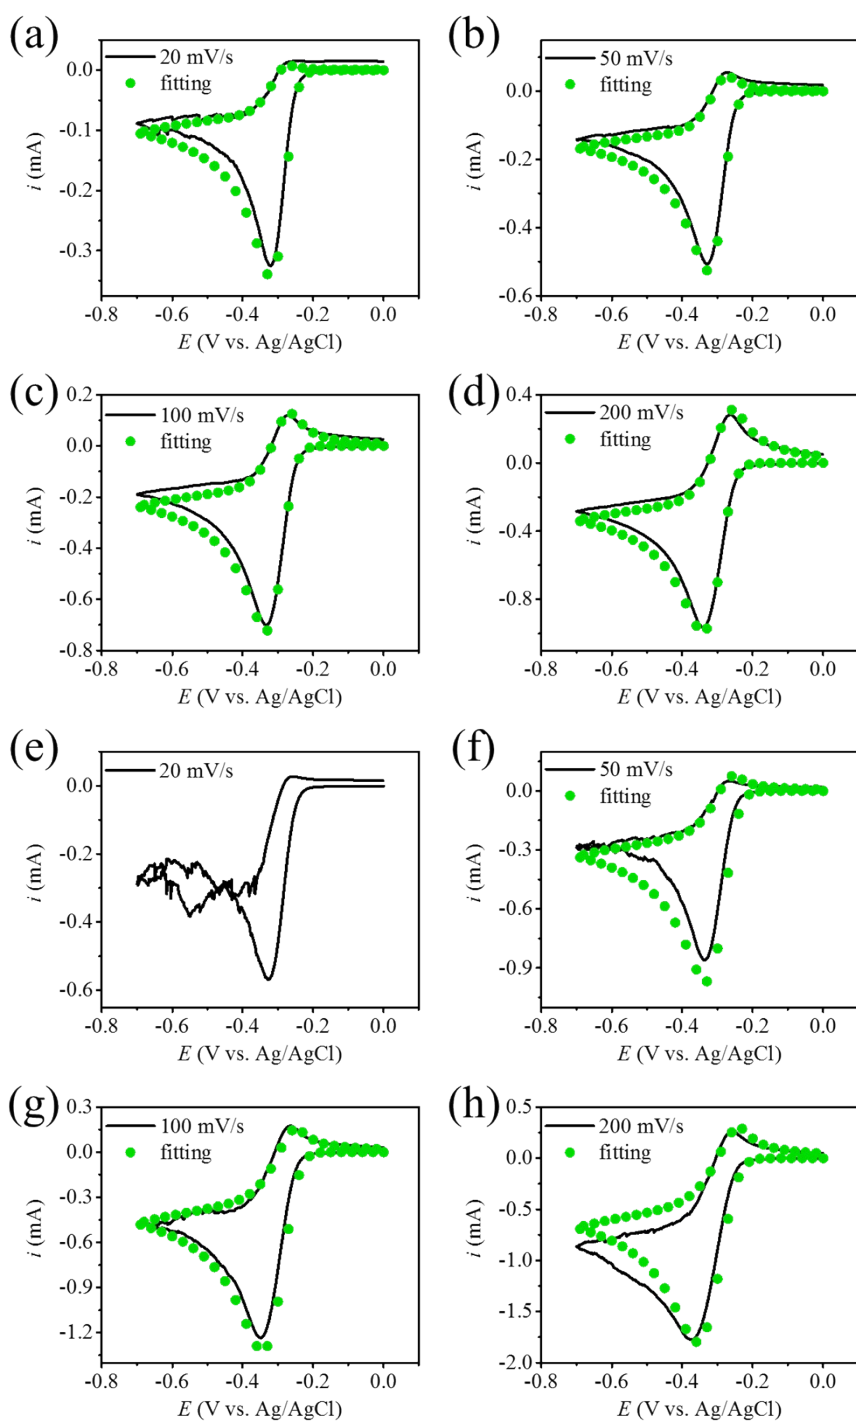

**Figure S8.** The CVs (black line) at various  $v$  (20, 50, 100, and 200 mV/s) on a Pt MDE in 6 m LiCl solutions containing either (a-d) 50 or (e-h) 100 mM  $\text{HClO}_4$ , and the corresponding best-fit simulation results (dotted green circle). For the CV in e, the experimentally obtained CV was too distorted to be fitted by the digital simulation due to the adsorption of  $\text{H}_2$  bubbles on an electrode surface.

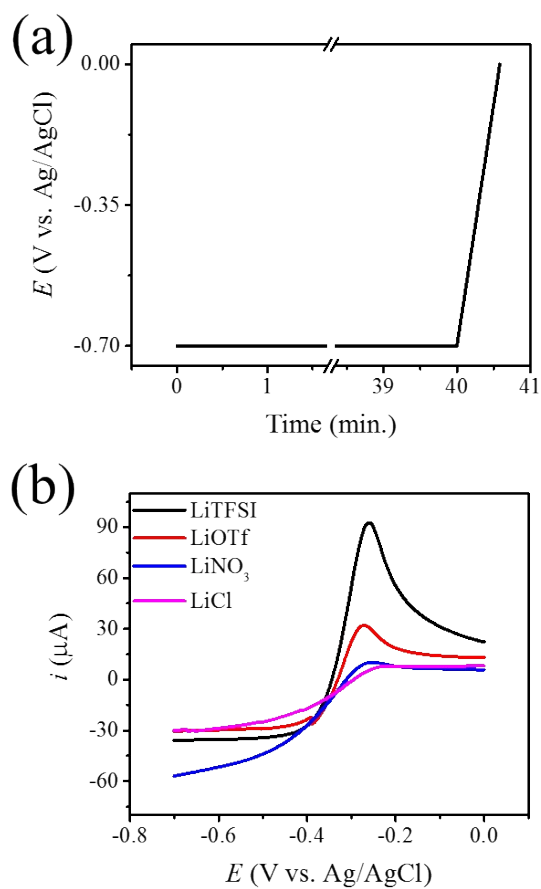

**Figure S9.** (a) The electrode potential profile vs.  $t$  for (b) the resulting voltammograms at 20 mV/s, which were measured from acidic solutions with the four different types of 6 m electrolytes.

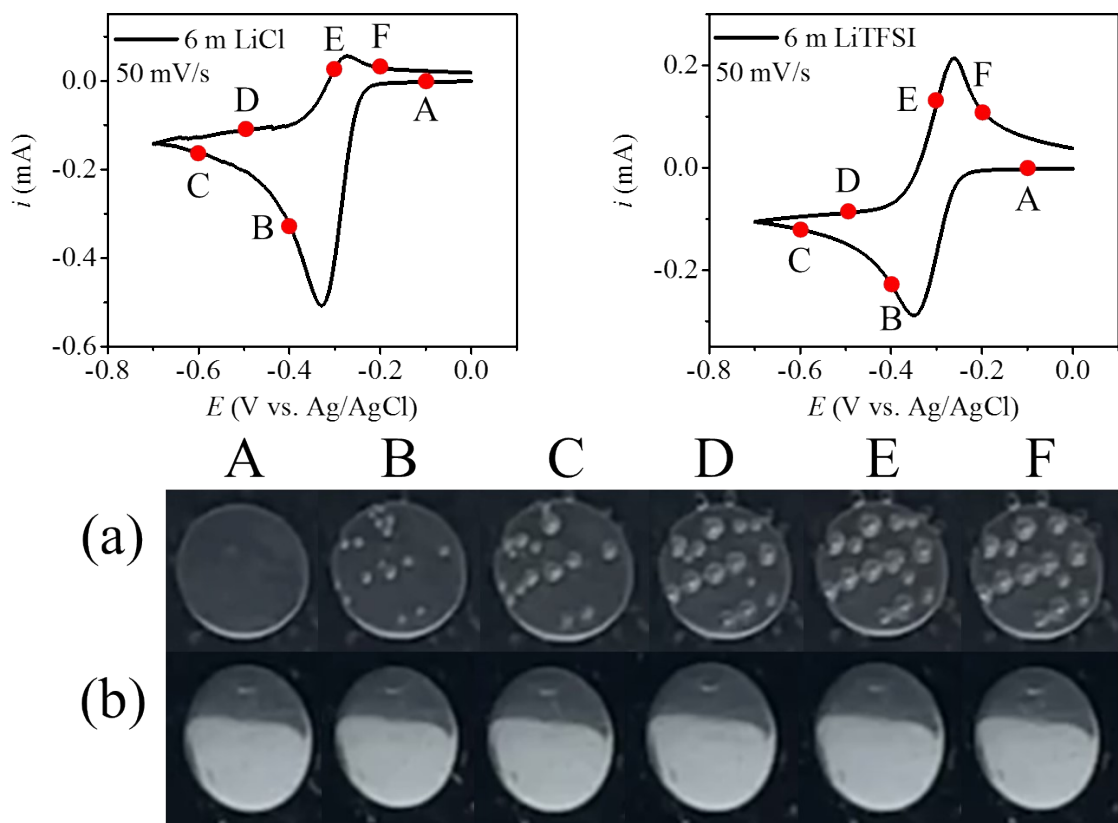

**Figure S10.** The sequential snapshots of H<sub>2</sub> bubble formation on a Pt MDE during cyclic voltammetry for H<sup>+</sup>/H<sub>2</sub> redox reaction in 50 mM HClO<sub>4</sub> solutions containing either (a) 6 m LiCl or (b) the same molal concentration of LiTFSI.

**Note S1. Estimation for thickness of a modulation layer**

The thickness of the modulation layer ( $\lambda$ ) in solutions with different types of 6 m electrolytes were estimated by the following equation.<sup>1</sup>

$$\lambda = \frac{1}{2} \left( \sqrt{\frac{\rho\omega}{2\eta}} \right)^{-1} \quad (1)$$

Here,  $\omega$  is the resonant frequency of the fundamental mode,  $\rho$  is the liquid density, and  $\eta$  is the liquid viscosity. Each of the corresponding parameters and the estimated  $\lambda$  in the different electrolytes solutions are listed in Table S2.

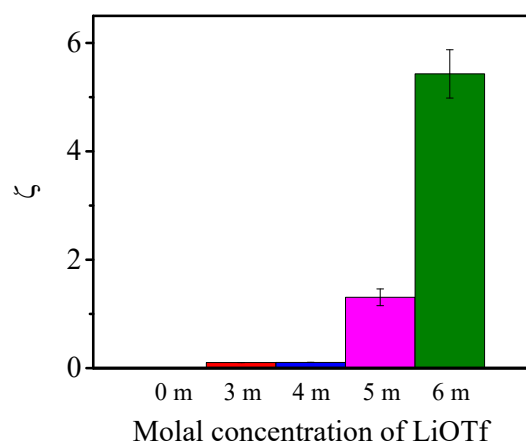

**Figure S11.** The  $\zeta$ -histograms obtained from  $\Delta f$  vs.  $t$  curves in acidic solutions containing various molal concentrations of LiOTf.



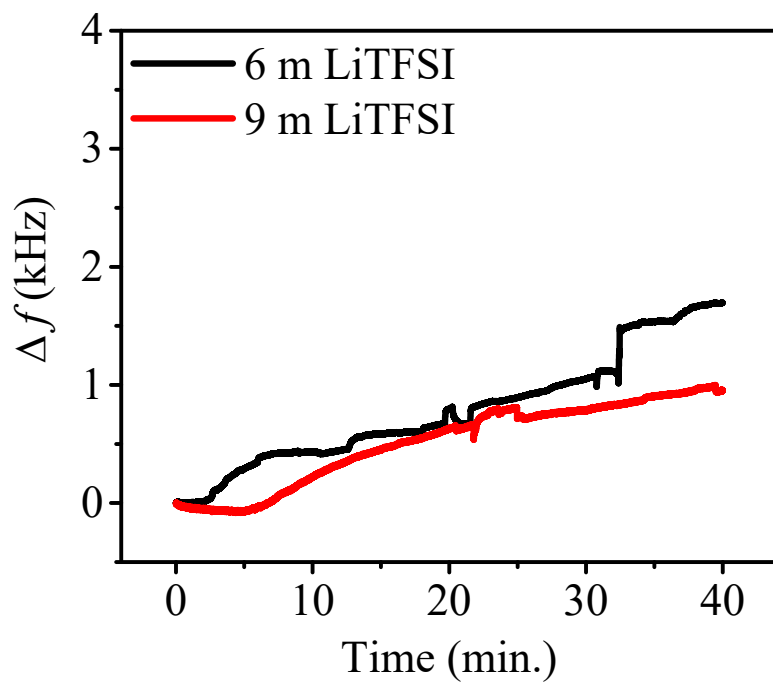

**Figure S12.** The  $\Delta f$  vs.  $t$  curves during HER on Pt electrodes in 50 mM HClO<sub>4</sub> solutions containing 6 m LiTFSI (black) and 9 m LiTFSI (red) through the EQCM measurements.

**Note S2. The EQCM measurements for retention of electrogenerated H<sub>2</sub> bubbles on a Pt electrode as a function of applied potentials**

We chose an aqueous acidic solution containing 3 m LiTFSI as a model electrolyte condition. For the EQCM measurements, -0.6 V was constantly applied for 40 minutes to drive HER, and the potential was stepped to various positive values for another 20 minutes. After  $\Delta f$  increased and reached at the equilibrium under at constantly applied -0.6 V for 40 min., the potential was stepped to either 0 or 0.5 V, and  $\Delta f$  barely decreased (see Figure S9a-b). As the electrode potential was positively stepped to 1 and 1.5 V (Figure S9c-d),  $\Delta f$  instantaneously reduced, and in the case of 1.5 V,  $\Delta f$  was even reduced to  $\sim 0$ .

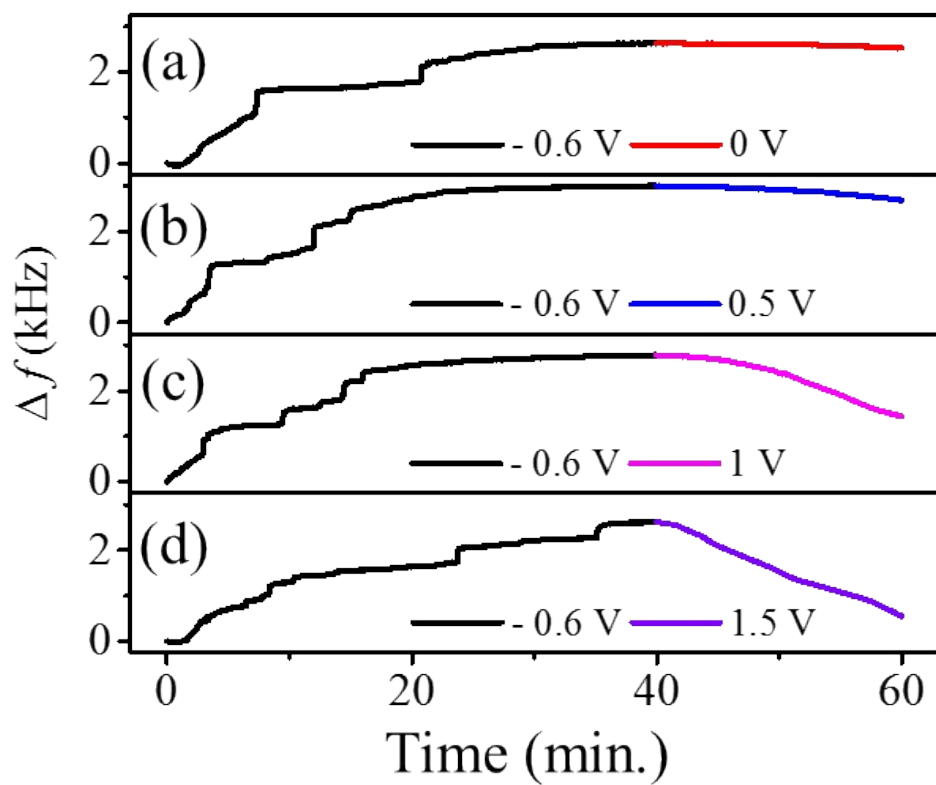

**Figure S13.** The  $\Delta f$  vs.  $t$  curves measured in acidic 3 m LiTFSI solutions on a Pt electrode as the electrode potential was applied to -0.6 V for 40 minutes and stepped to (a) 0, (b) 0.5, (c) 1, and (d) 1.5 V vs. Ag/AgCl, respectively.

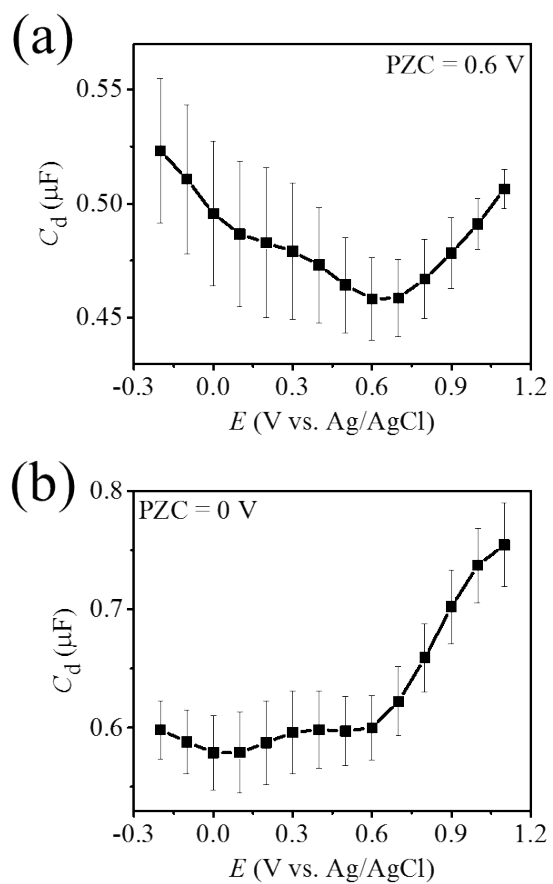

**Figure S14.** The  $C_d$  as a function of the electrode potentials (vs. Ag/AgCl) on Pt MDEs in 6 m (a) LiTFSI and (b) LiOTf solutions.

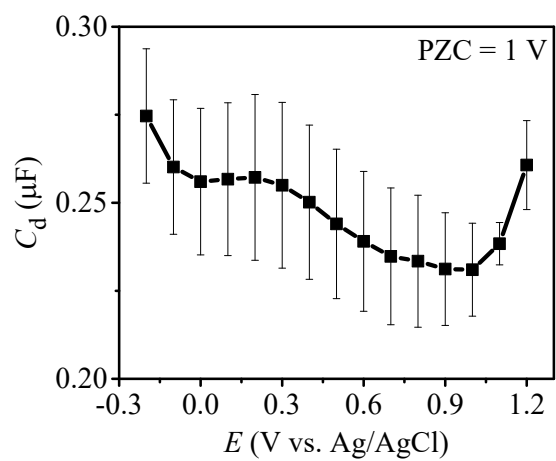

**Figure S15.** The  $C_d$  as a function of the electrode potentials (vs. Ag/AgCl) on an Au MDE in a 6 m LiTFSI solution.

**Table S1.** The reaction parameters for the simulation results in Figure S5-S8. The transfer coefficients of all the charge transfer reactions were assumed to be 0.5.

|                                                              | 6 m LiTFSI                                                                                   | 6 m LiOTf                                                                                    | 6 m LiNO <sub>3</sub>                                                                        | 6 m LiCl                                                                                     |
|--------------------------------------------------------------|----------------------------------------------------------------------------------------------|----------------------------------------------------------------------------------------------|----------------------------------------------------------------------------------------------|----------------------------------------------------------------------------------------------|
| Diffusion coefficient                                        | $D_{H^+} = 9 \times 10^{-6} \text{ cm}^2/\text{s}$                                           | $D_{H^+} = 1.4 \times 10^{-5} \text{ cm}^2/\text{s}$                                         | $D_{H^+} = 3 \times 10^{-5} \text{ cm}^2/\text{s}$                                           | $D_{H^+} = 3 \times 10^{-5} \text{ cm}^2/\text{s}$                                           |
| Charge transfer reaction<br>$H^+ + e^- \rightleftharpoons H$ | $E^0 = -0.4 \text{ V}$<br>$k_{ct} = 0.03 \text{ cm/s}$                                       | $E^0 = -0.4 \text{ V}$<br>$k_{ct} = 0.03 \text{ cm/s}$                                       | $E^0 = -0.4 \text{ V}$<br>$k_{ct} = 0.03 \text{ cm/s}$                                       | $E^0 = -0.4 \text{ V}$<br>$k_{ct} = 0.03 \text{ cm/s}$                                       |
| Chemical reaction<br>$H + H \rightleftharpoons H_2$          | $K_{eq} = 2 \times 10^4 \text{ M}^{-1}$<br>$k_f = 2 \times 10^7 \text{ M}^{-1}\text{s}^{-1}$ | $K_{eq} = 2 \times 10^4 \text{ M}^{-1}$<br>$k_f = 2 \times 10^7 \text{ M}^{-1}\text{s}^{-1}$ | $K_{eq} = 2 \times 10^4 \text{ M}^{-1}$<br>$k_f = 2 \times 10^7 \text{ M}^{-1}\text{s}^{-1}$ | $K_{eq} = 2 \times 10^4 \text{ M}^{-1}$<br>$k_f = 2 \times 10^7 \text{ M}^{-1}\text{s}^{-1}$ |
| $H_2 + H_2 \rightleftharpoons (H_2)_2$                       | $K_{eq} = 3.5 \times 10^8 \text{ M}^{-1}$<br>$k_f = 0.01 \text{ M}^{-1}\text{s}^{-1}$        | $K_{eq} = 3.5 \times 10^8 \text{ M}^{-1}$<br>$k_f = 0.6 \text{ M}^{-1}\text{s}^{-1}$         | $K_{eq} = 3.5 \times 10^8 \text{ M}^{-1}$<br>$k_f = 4 \text{ M}^{-1}\text{s}^{-1}$           | $K_{eq} = 3.5 \times 10^8 \text{ M}^{-1}$<br>$k_f = 56 \text{ M}^{-1}\text{s}^{-1}$          |

**Table S2.** The measured parameters in acidic solutions containing different types of 6 m electrolytes for the calculation of the thickness of the modulation layers,  $\lambda$ .

|                             | <b>No Li<br/>electrolytes</b> | <b>6 m LiTFSI</b> | <b>6 m LiOTf</b> | <b>6 m LiNO<sub>3</sub></b> | <b>6 m LiCl</b> |
|-----------------------------|-------------------------------|-------------------|------------------|-----------------------------|-----------------|
| $\eta$ (cp)                 | 0.91                          | 4.51              | 3.4              | 2.2                         | 1.9             |
| $\rho$ (g/cm <sup>3</sup> ) | 1.03                          | 1.44              | 1.33             | 1.2                         | 1.12            |
| $\lambda$ (nm)              | 220                           | 420               | 380              | 320                         | 308             |

## References

1. S. Na Songkhla and T. Nakamoto, *Chemosensors*, 2021, **9**, 350.
